# Supplementary material
Source: PubMed Central journal article supplement (PMC2002529)
Supplement: 7400955-s1.pdf [file 7400955-s1.pdf]

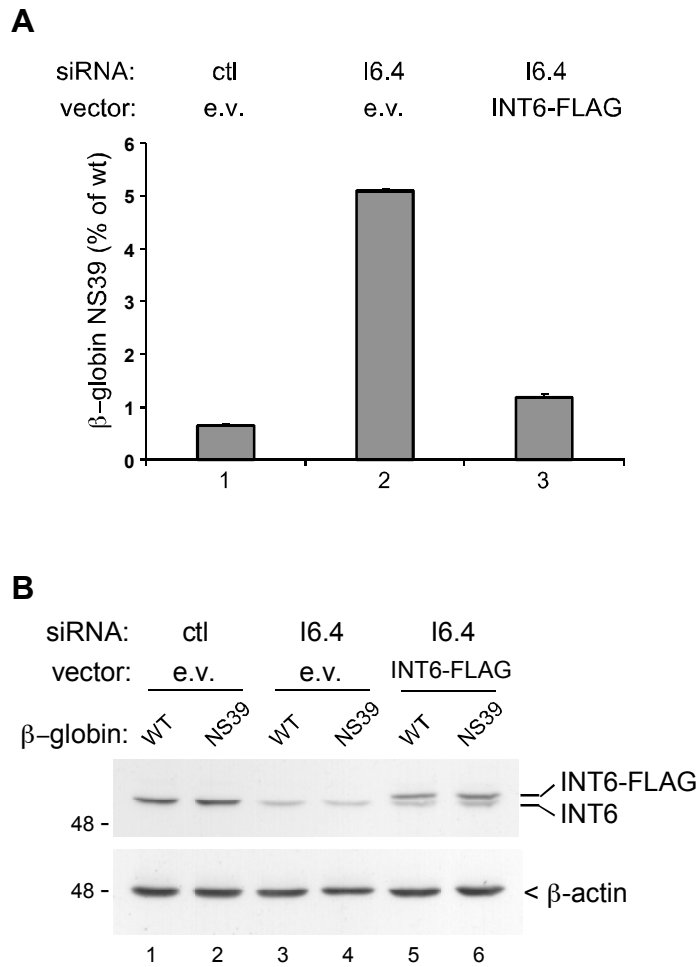

Figure S1. **(A)** Rescue of the NMD process following transfection of a siRNA-resistant INT6 expression vector. The NMD assay was performed as in Figure 1 of the manuscript, with the exception that INT6 depletion was achieved using the I6.4 siRNA (Table 2), in the absence (lane 2) or in the presence (lane 3) of a INT6-FLAG fusion protein expressed from a vector lacking the sequence targeted by I6.4 which is located in the 3' untranslated part of the INT6 mRNA. Cells were also transfected with control siRNA and empty pSG5 expression vector (e.v., lane 1). **(B)** Silencing of endogenous INT6 and transient expression of INT6-FLAG was verified by immunoblot with an antibody to INT6 and equal protein loading was controlled by detection of  $\beta$ -actin.
